# Supplementary material for: ‘Chiron’ approach to stereoselective synthesis of sphinganine and unnatural safingol, an antineoplastic and antipsoriatic agent
Source: Royal Society of Chemistry journal article supplement (doi:10.1039/c5ra27342k), 2016-01-01
Supplement: c5ra27342k1.pdf [file c5ra27342k1.pdf]

## Supplementary Data

### **‘Chiron’ approach to stereoselective synthesis of Sphinganine and unnatural Safingol, an antineoplastic and antipsoriatic agent**

Somireddy Kundooru, Pintu Das and Arun K. Shaw\*

*Division of Medicinal and Process Chemistry, CSIR-Central Drug Research Institute, Lucknow 226 031, India.*

#### **Contents:**

|                                                                   |              |
|-------------------------------------------------------------------|--------------|
| 1. <sup>1</sup> H NMR data of Compound <b>4</b>                   | Page No – 2  |
| 2. <sup>13</sup> C NMR data of Compound <b>4</b>                  | Page No – 3  |
| 3. <sup>1</sup> H data of Compound <b>5</b>                       | Page No – 3  |
| 4. <sup>1</sup> H and <sup>13</sup> C data of Compound <b>5</b>   | Page No – 4  |
| 5. <sup>1</sup> H data of Compound <b>7</b>                       | Page No – 5  |
| 6. <sup>13</sup> C data of Compound <b>7</b>                      | Page No – 6  |
| 7. <sup>1</sup> H data of Compound <b>8</b>                       | Page No – 6  |
| 8. <sup>1</sup> H and <sup>13</sup> C data of Compound <b>8</b>   | Page No – 7  |
| 9. <sup>1</sup> H and <sup>13</sup> C data of Compound <b>1</b>   | Page No – 8  |
| 10. <sup>1</sup> H data of Compound <b>12</b>                     | Page No – 9  |
| 11. <sup>13</sup> C data of Compound <b>12</b>                    | Page No – 10 |
| 12. <sup>1</sup> H data of Compound <b>13</b>                     | Page No – 10 |
| 13. <sup>1</sup> H and <sup>13</sup> C data of Compound <b>13</b> | Page No – 11 |
| 14. <sup>1</sup> H data of Compound <b>15</b>                     | Page No – 12 |
| 15. <sup>13</sup> C data of Compound <b>15</b>                    | Page No – 12 |
| 16. <sup>1</sup> H data of Compound <b>16</b>                     | Page No – 13 |
| 17. <sup>1</sup> H and <sup>13</sup> C data of Compound <b>16</b> | Page No – 14 |
| 18. <sup>1</sup> H and <sup>13</sup> C data of Compound <b>17</b> | Page No – 15 |
| 19. HRMS Spectra of compounds <b>4</b> and <b>5</b>               | Page No – 16 |
| 20. HRMS Spectra of compounds <b>7</b> and <b>8</b>               | Page No – 17 |
| 21. HRMS Spectra of compounds <b>1(Sphinganine)</b> and <b>12</b> | Page No – 18 |
| 22. HRMS Spectra of compounds <b>13</b> and <b>15</b>             | Page No – 19 |
| 23. HRMS Spectra of compounds <b>16</b> and <b>17(Safingol)</b>   | Page No – 20 |

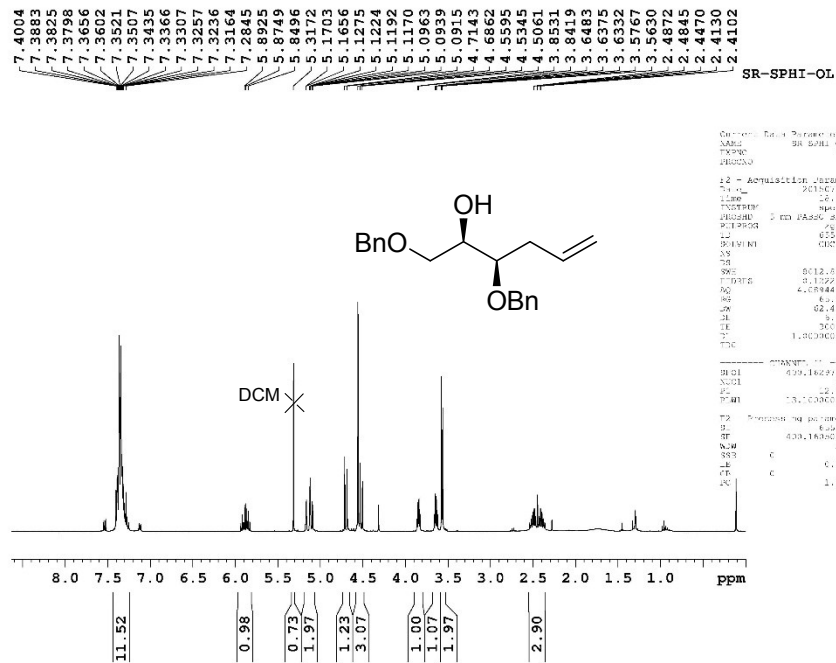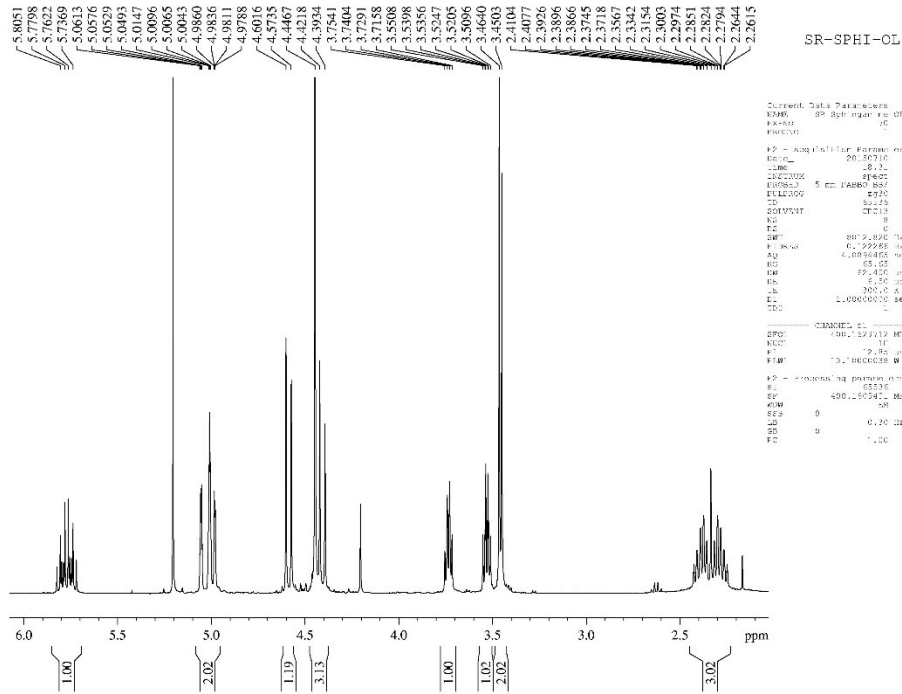

<sup>1</sup>H NMR Spectra of Compound 4

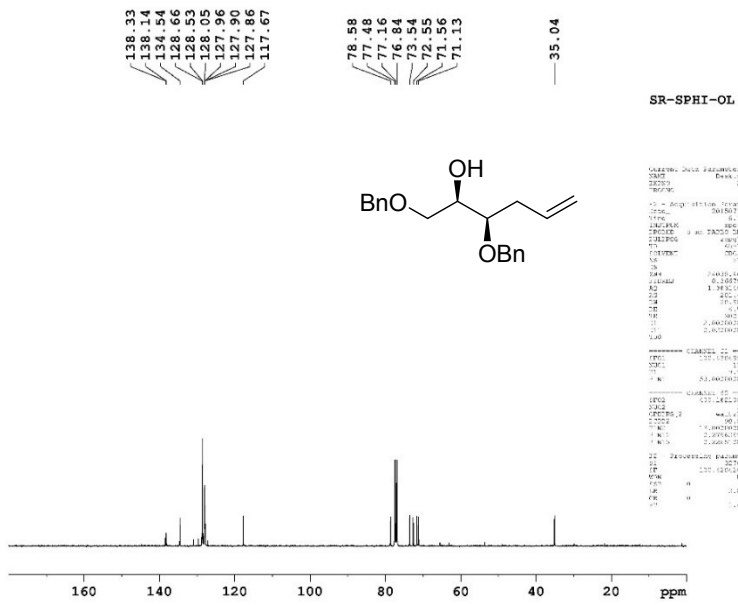

**<sup>13</sup>C NMR Spectrum of Compound 4**

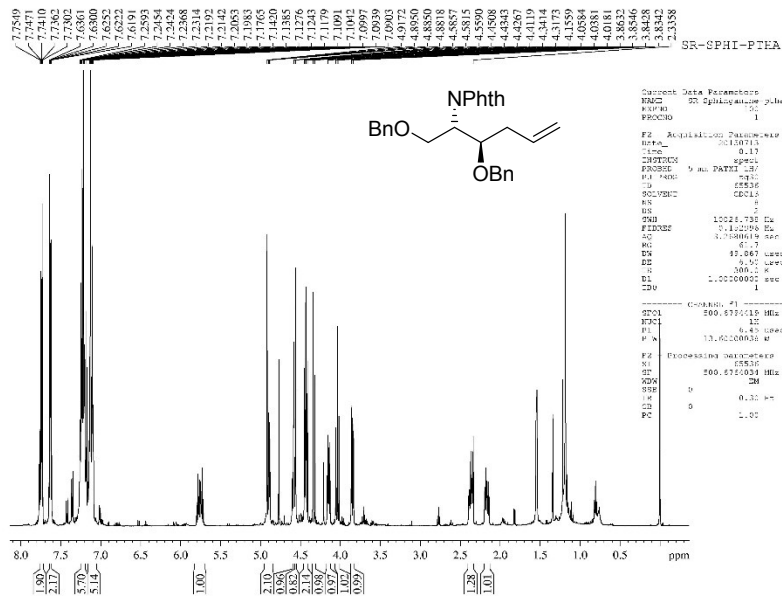

**<sup>1</sup>H NMR Spectrum of Compound 5**

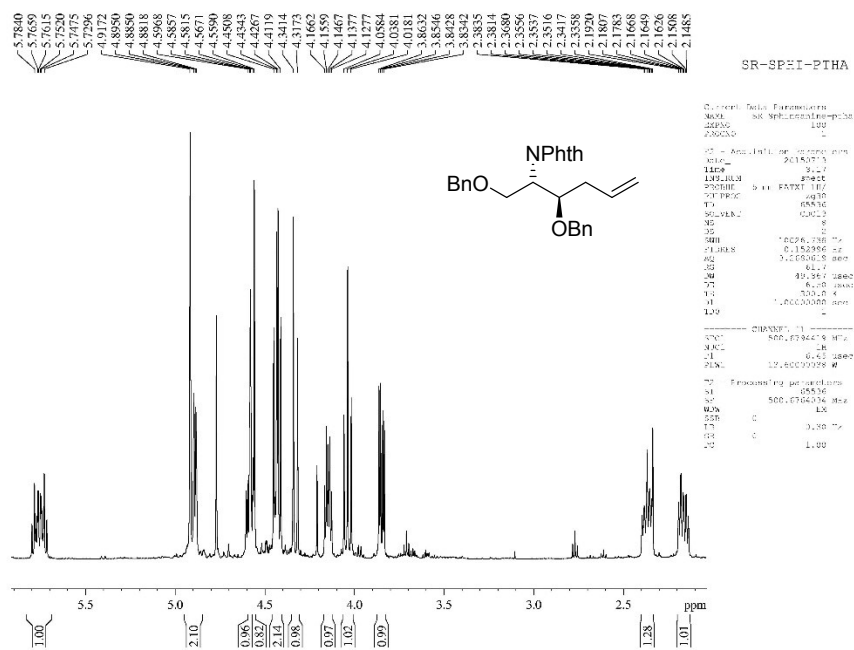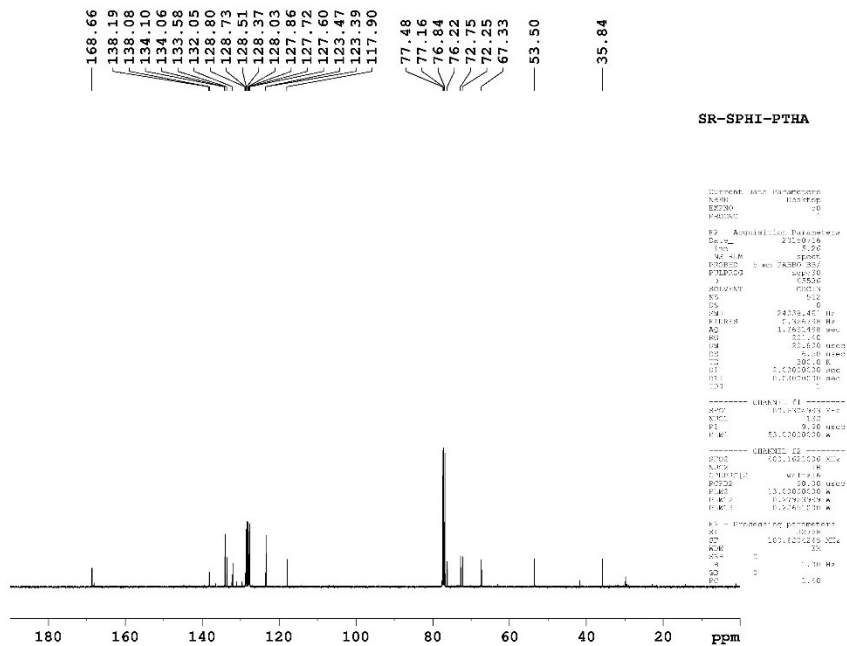

**<sup>1</sup>H and <sup>13</sup>C NMR Spectra of Compound 5**

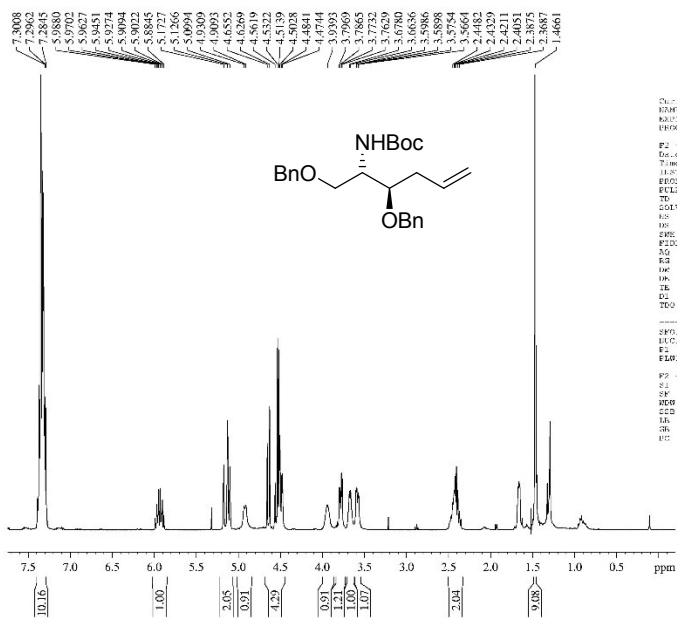

SR-SPHI-BOC

```

Current Data Parameters
NAME SR SPHI-BOC
EXPNO 30
PROCNO 1

F2 - Acquisition Parameters
Date_ 20150717
Time 11:27
INSTRUM spect
PROBHD 5 mm PABBO BB
PULPROG zg30
TD 65536
SOLVENT CDCl3
NS 8
DS 8
SWH 8012.820 Hz
FIDRES 0.122216 Hz
AQ 4.058443 sec
RG 65.55
DE 62.400 usec
TE 300.2 K
SI 1.00000000 sec
RG 1

===== CHANNEL f1 =====
SF01 400.162912 MHz
NUC1 1H
P1 13.20 usec
PL1 13.00000000 W

F2 - Processing parameters
SI 65536
SF 400.1605000 MHz
WDW EM
SSB 0
LB 0.30 Hz
GB 0
EC 1.00
  
```

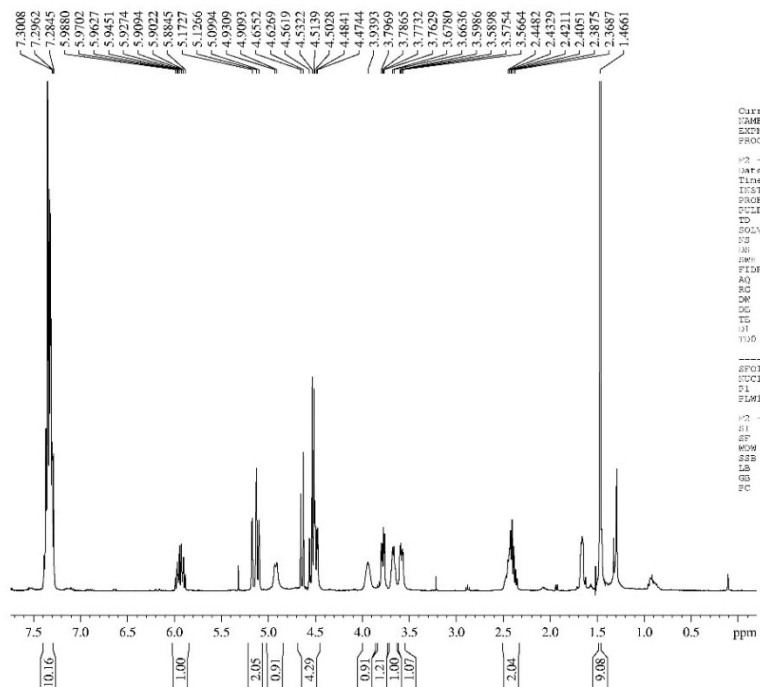

SR-SPHI-BOC

```

Current Data Parameters
NAME SR SPHI-BOC
EXPNO 30
PROCNO 1

F2 - Acquisition Parameters
Date_ 20150717
Time 11:27
INSTRUM spect
PROBHD 5 mm PABBO BB
PULPROG zg30
TD 65536
SOLVENT CDCl3
NS 8
DS 8
SWH 8012.820 Hz
FIDRES 0.122216 Hz
AQ 4.058443 sec
RG 65.55
DE 62.400 usec
TE 300.2 K
SI 1.00000000 sec
RG 1

===== CHANNEL f1 =====
SF01 400.162912 MHz
NUC1 1H
P1 13.20 usec
PL1 13.00000000 W

F2 - Processing parameters
SI 65536
SF 400.1605000 MHz
WDW EM
SSB 0
LB 0.30 Hz
GB 0
EC 1.00
  
```

**<sup>1</sup>H NMR Spectra of Compound 7**

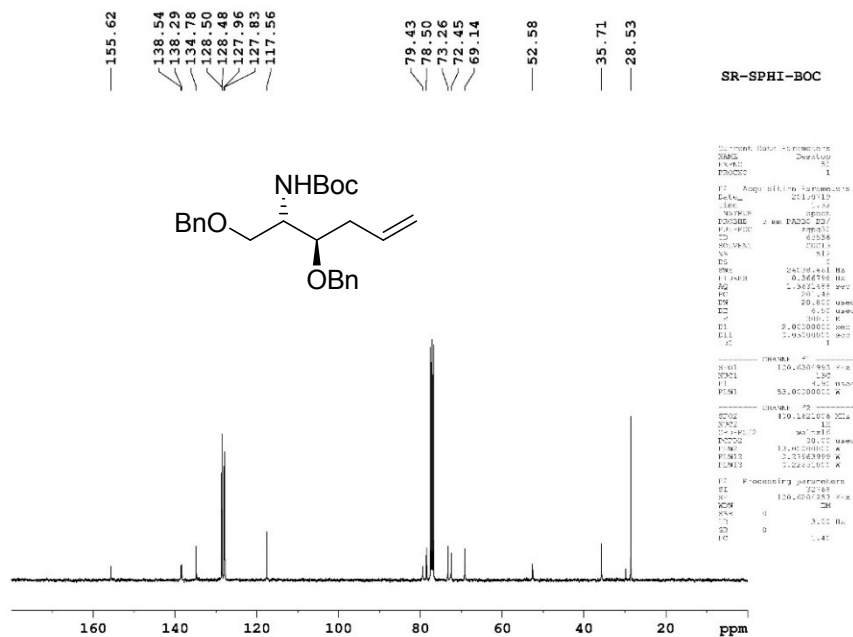

**$^{13}\text{C}$ NMR Spectrum of Compound 7**

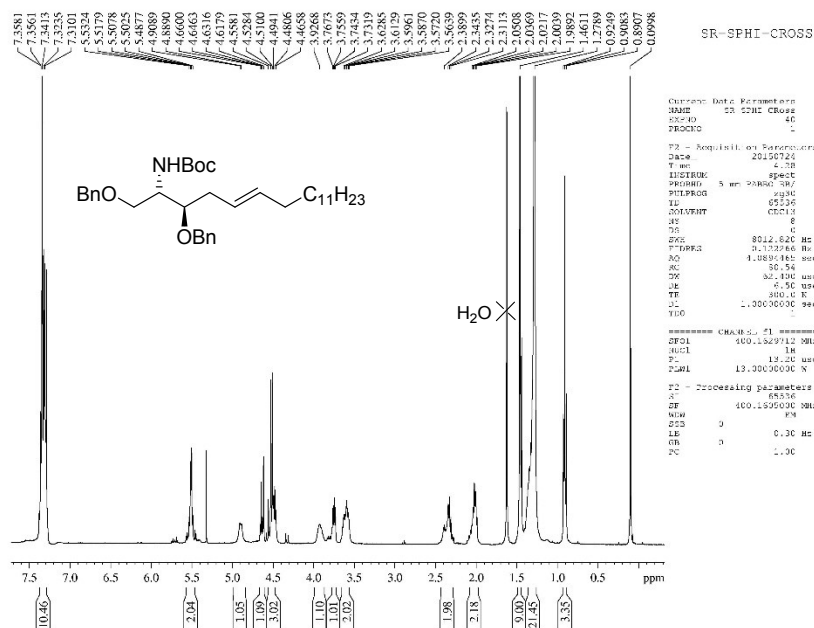

**$^1\text{H}$  NMR Spectra of Compound 8**

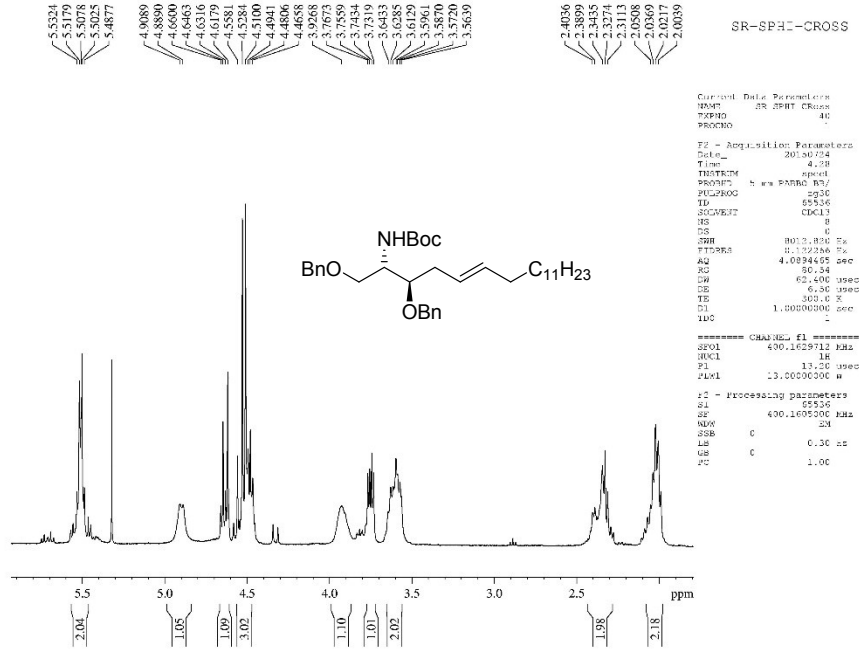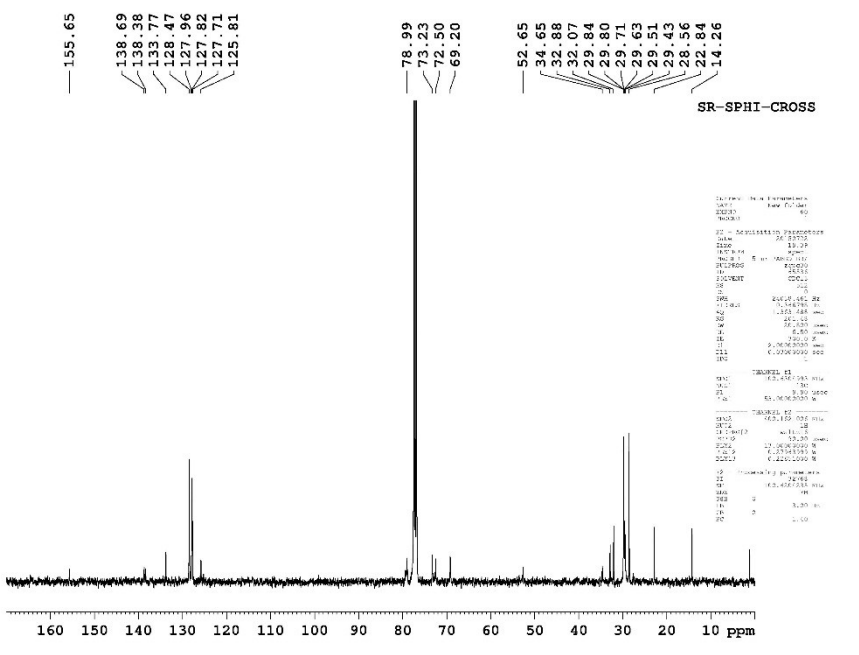

<sup>1</sup>H and <sup>13</sup>C NMR Spectra of Compound 8

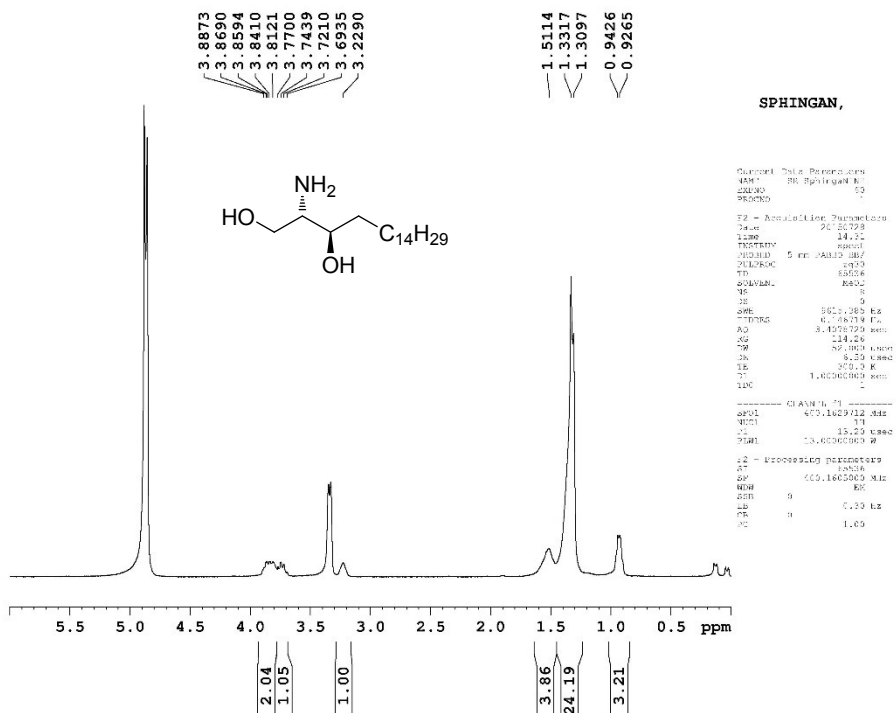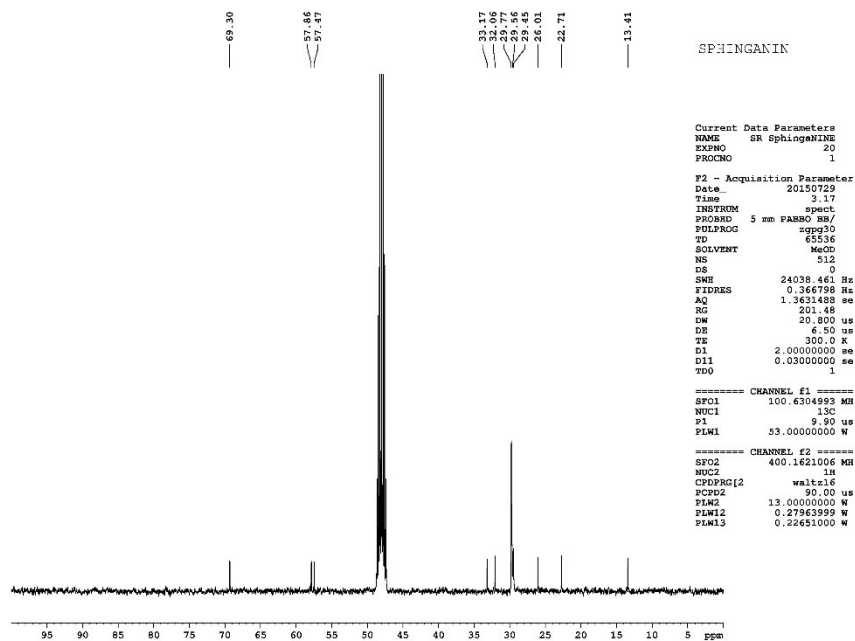

**<sup>1</sup>H and <sup>13</sup>C NMR Spectra of Spinganine 1**



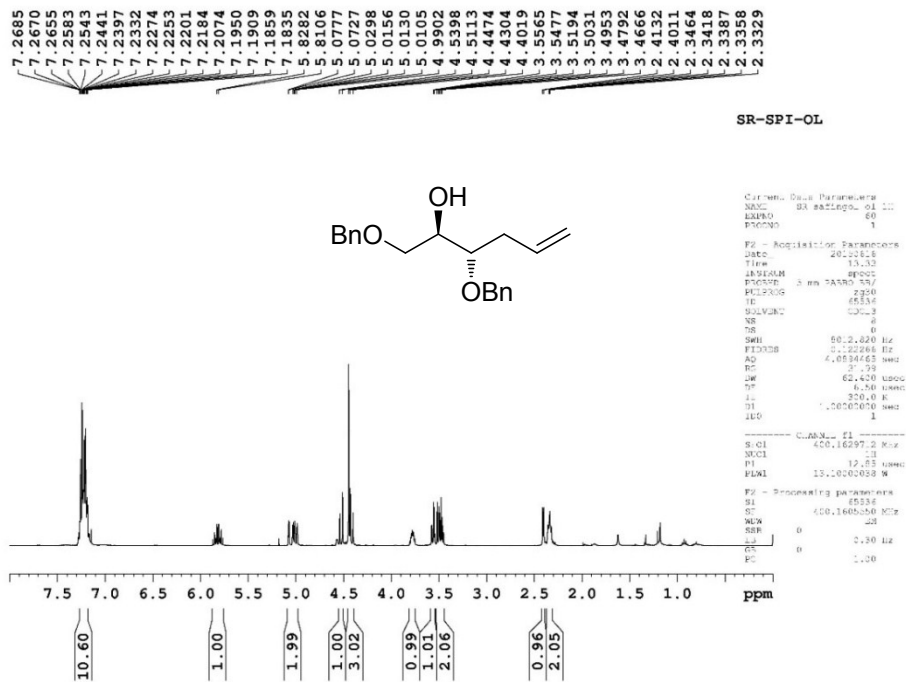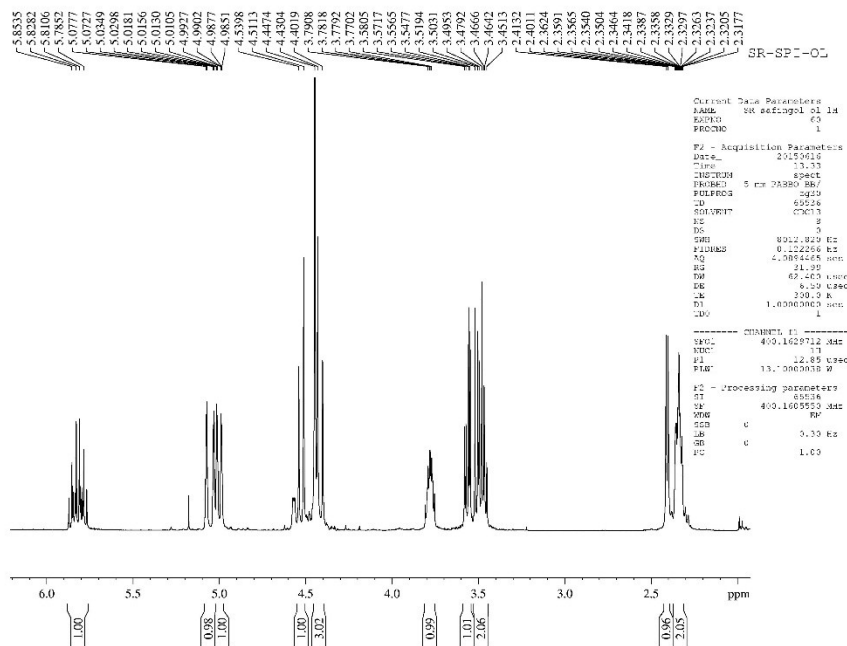

**<sup>1</sup>H NMR Spectra of Compound 12**

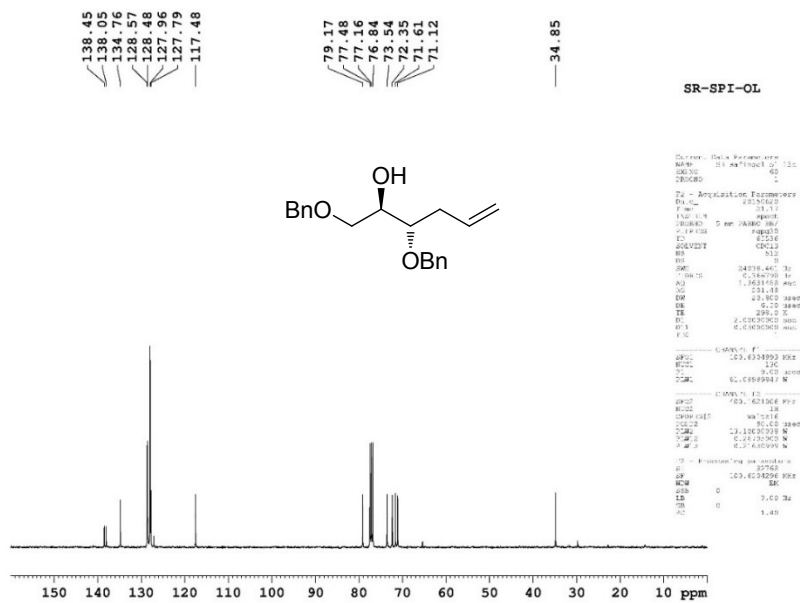

**<sup>13</sup>C NMR Spectrum of Compound 12**

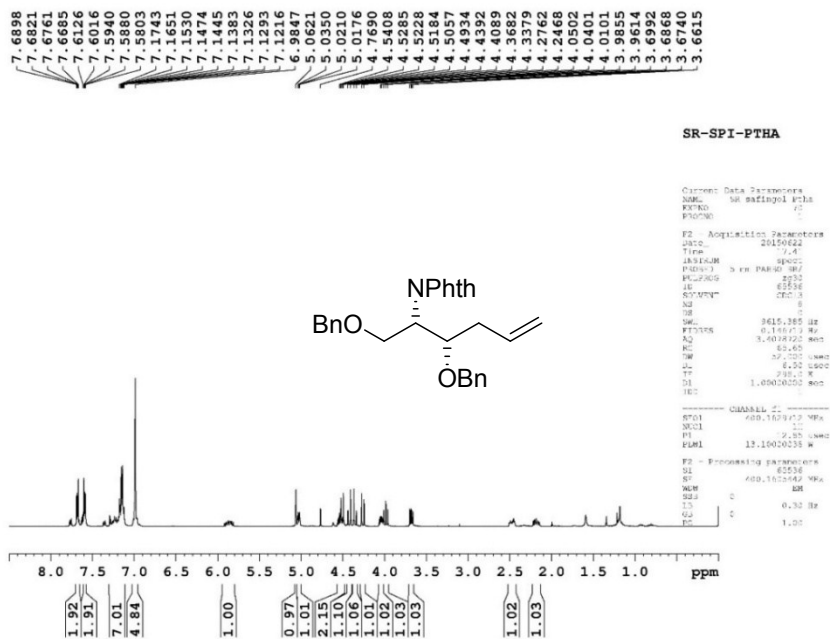

**<sup>1</sup>H NMR Spectrum of Compound 13**

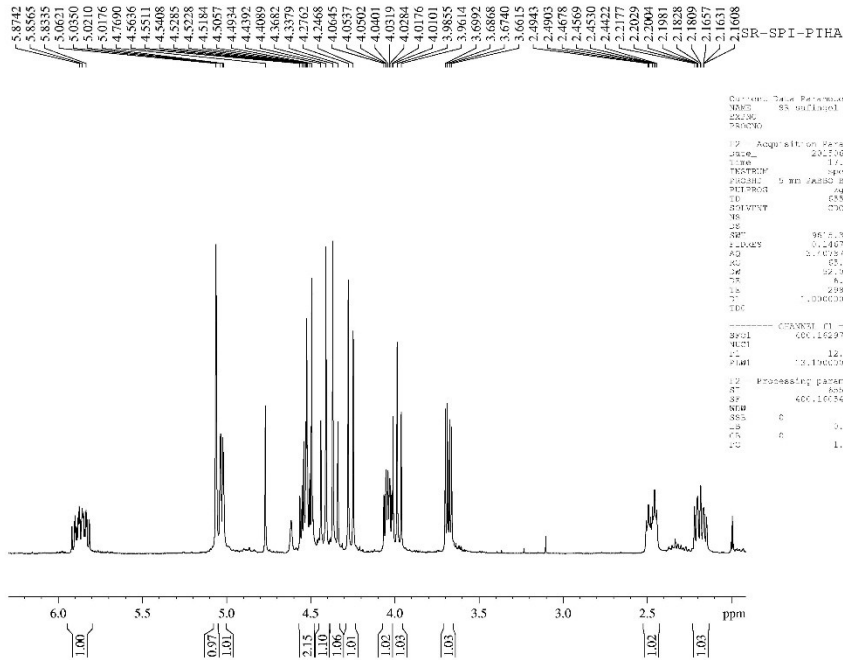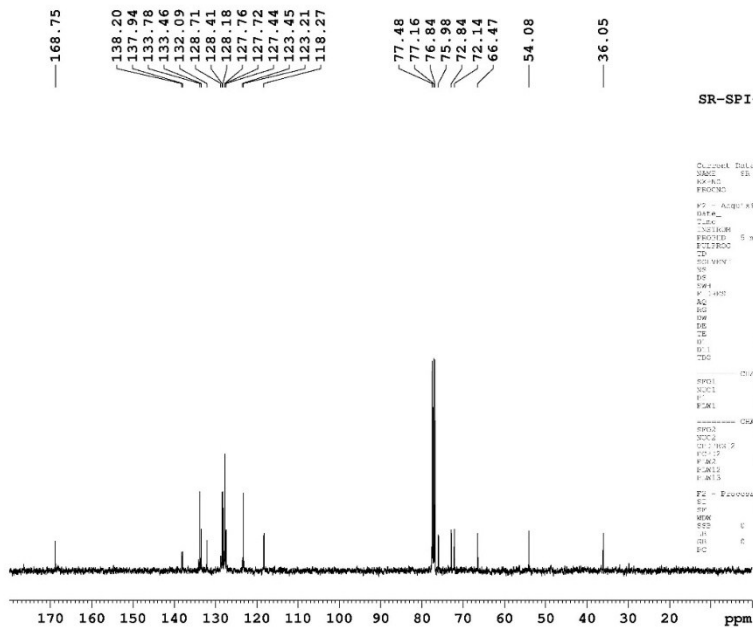

**$^1\text{H}$  and  $^{13}\text{C}$ NMR Spectra of Compound 13**

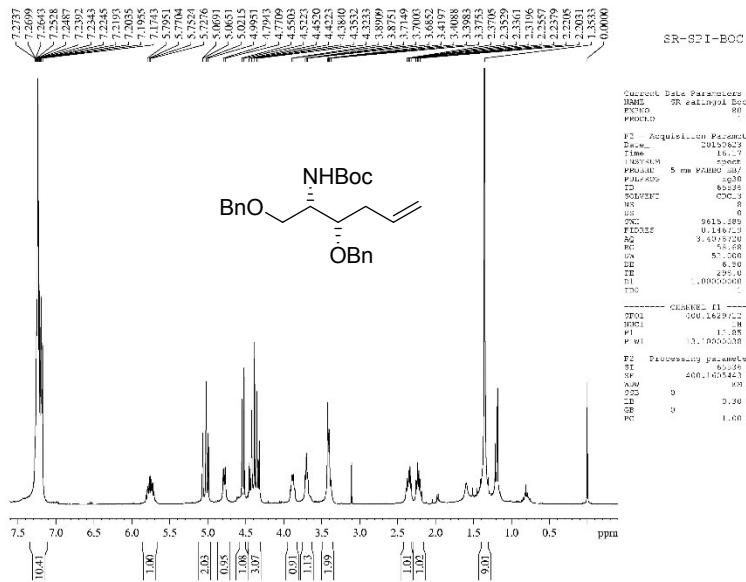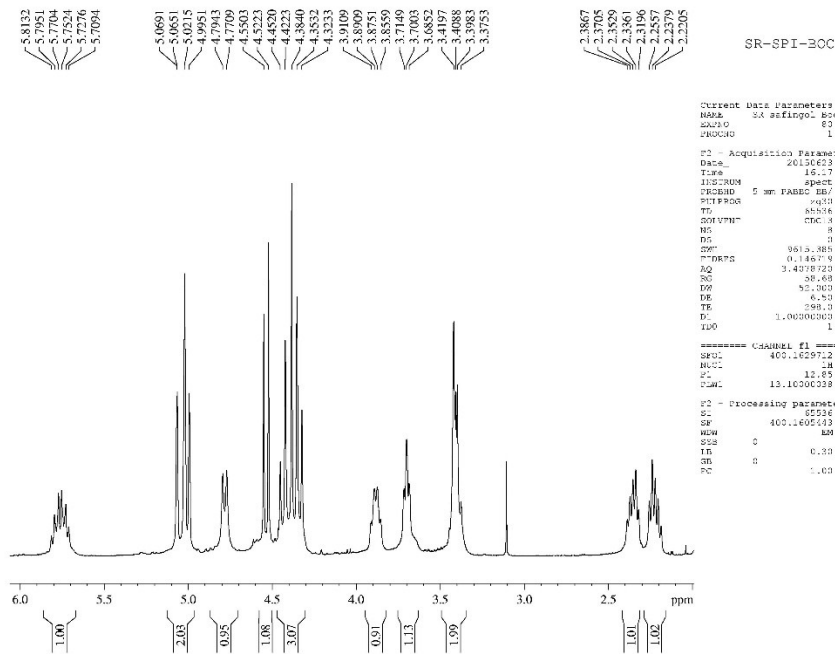

**<sup>1</sup>H NMR Spectra of Compound 15**

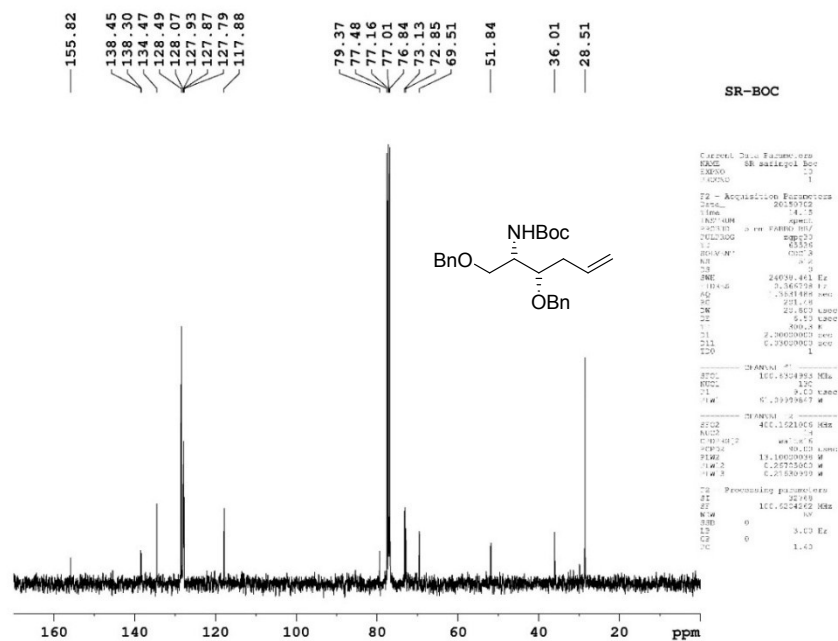

<sup>13</sup>CNMR Spectrum of Compound 15

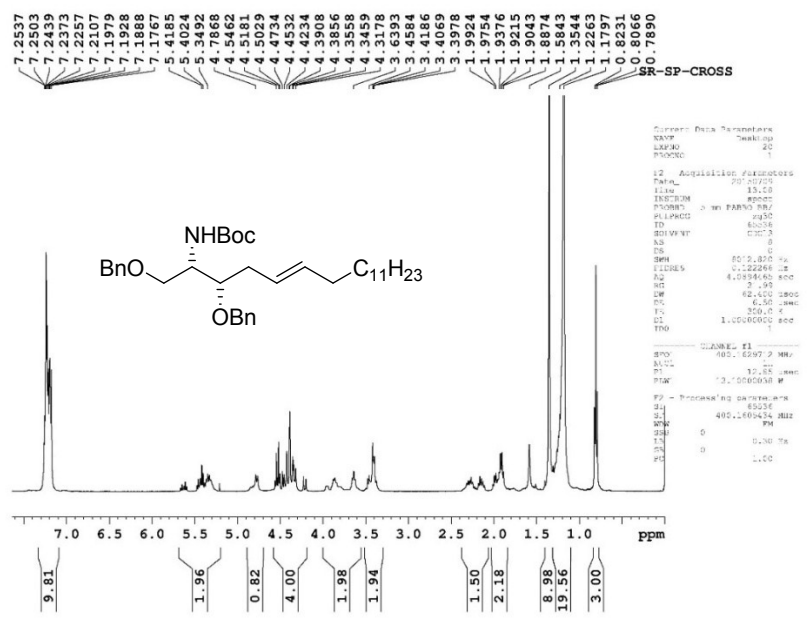

<sup>1</sup>H NMR Spectra of Compound 16

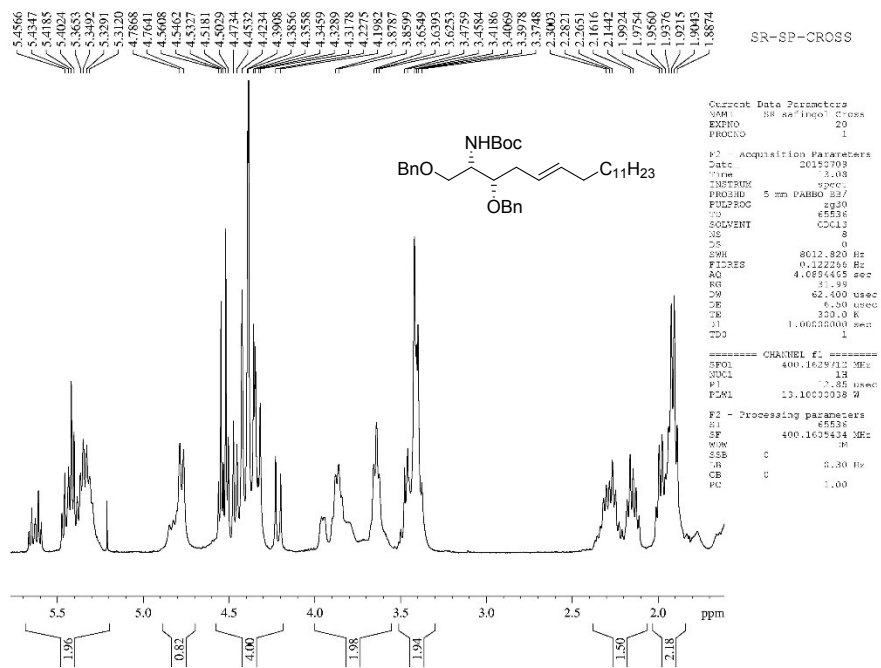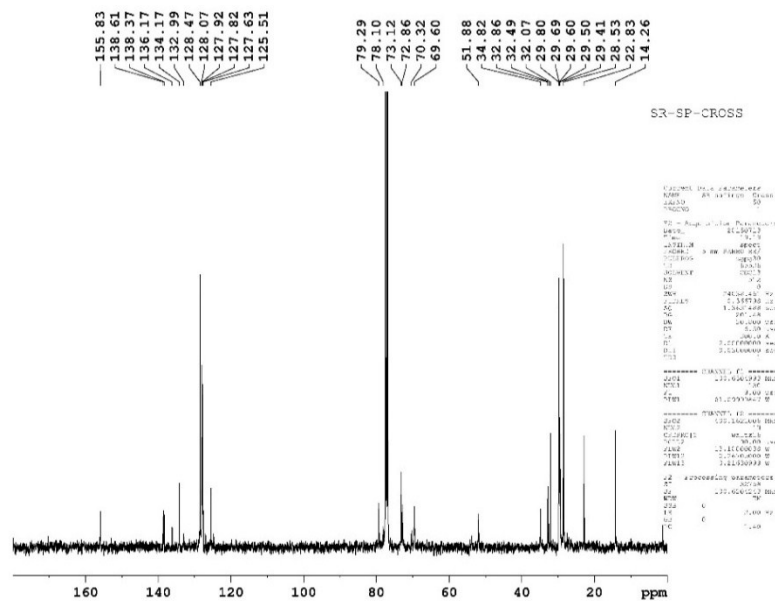

**<sup>13</sup>C NMR Spectra of Compound 16**

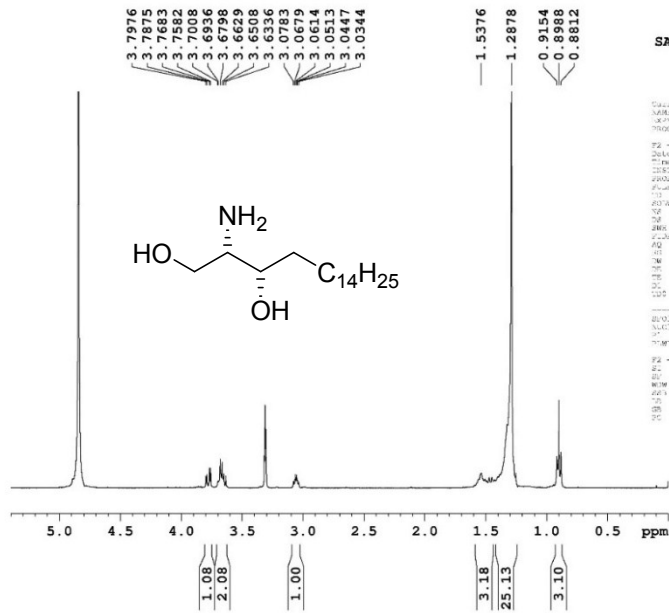

**SAFINGOL-HCL**

```

NAME: Safingol-HCL
EXPNO: 2
PROCNO: 1
PROCAM: 1
AQ: 0.10000000
RG: 327.50000000
SF: 300.13500000
WDW: EM
SSB: 0
LB: 3.00000000
GB: 0
PC: 1.00000000
SFO: 300.13500000
AQ: 0.10000000
RG: 327.50000000
SF: 300.13500000
WDW: EM
SSB: 0
LB: 3.00000000
GB: 0
PC: 1.00000000

```

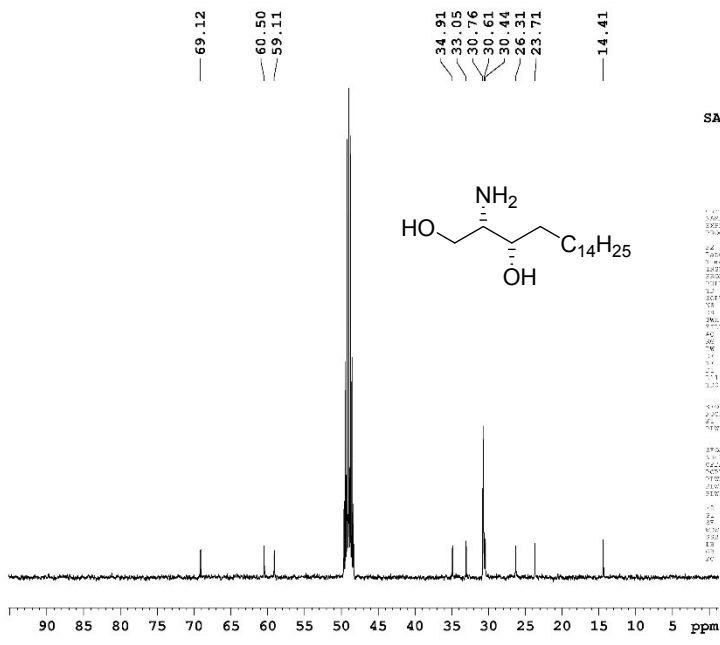

**SAFINGOL-HCL**

```

NAME: Safingol-HCL
EXPNO: 2
PROCNO: 1
PROCAM: 1
AQ: 0.10000000
RG: 327.50000000
SF: 300.13500000
WDW: EM
SSB: 0
LB: 3.00000000
GB: 0
PC: 1.00000000
SFO: 300.13500000
AQ: 0.10000000
RG: 327.50000000
SF: 300.13500000
WDW: EM
SSB: 0
LB: 3.00000000
GB: 0
PC: 1.00000000

```

**<sup>1</sup>H and <sup>13</sup>C NMR Spectra of Safingol 17**

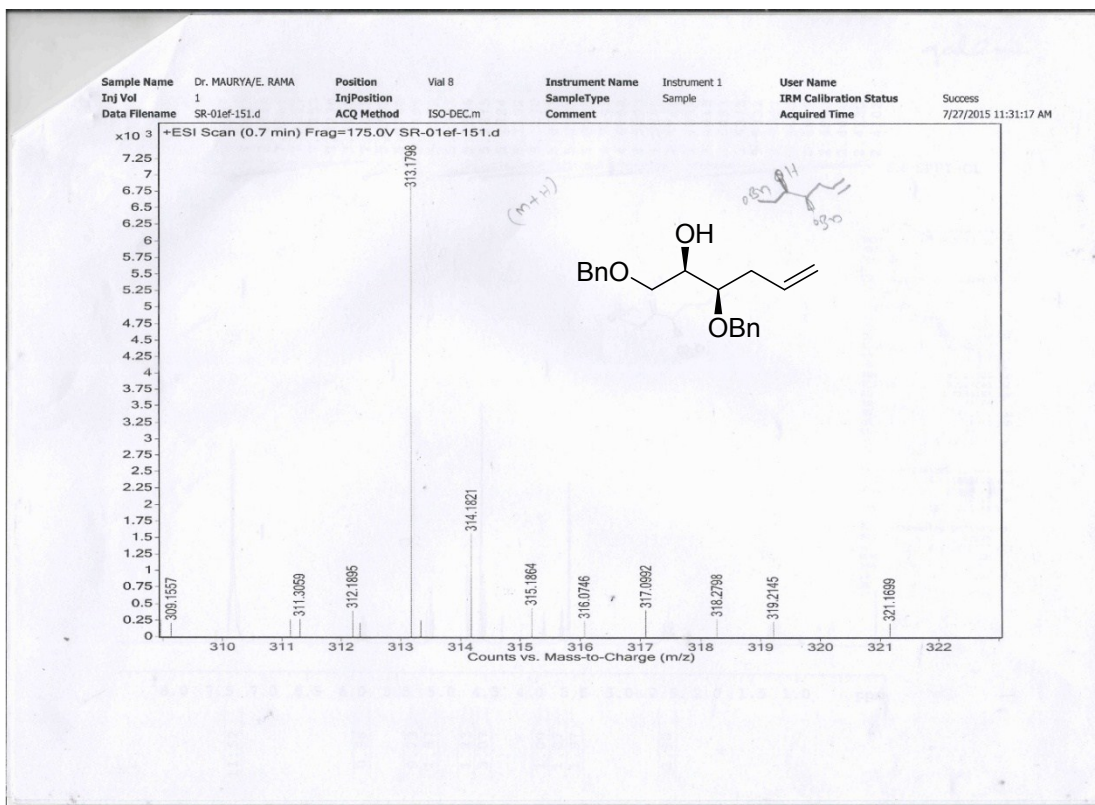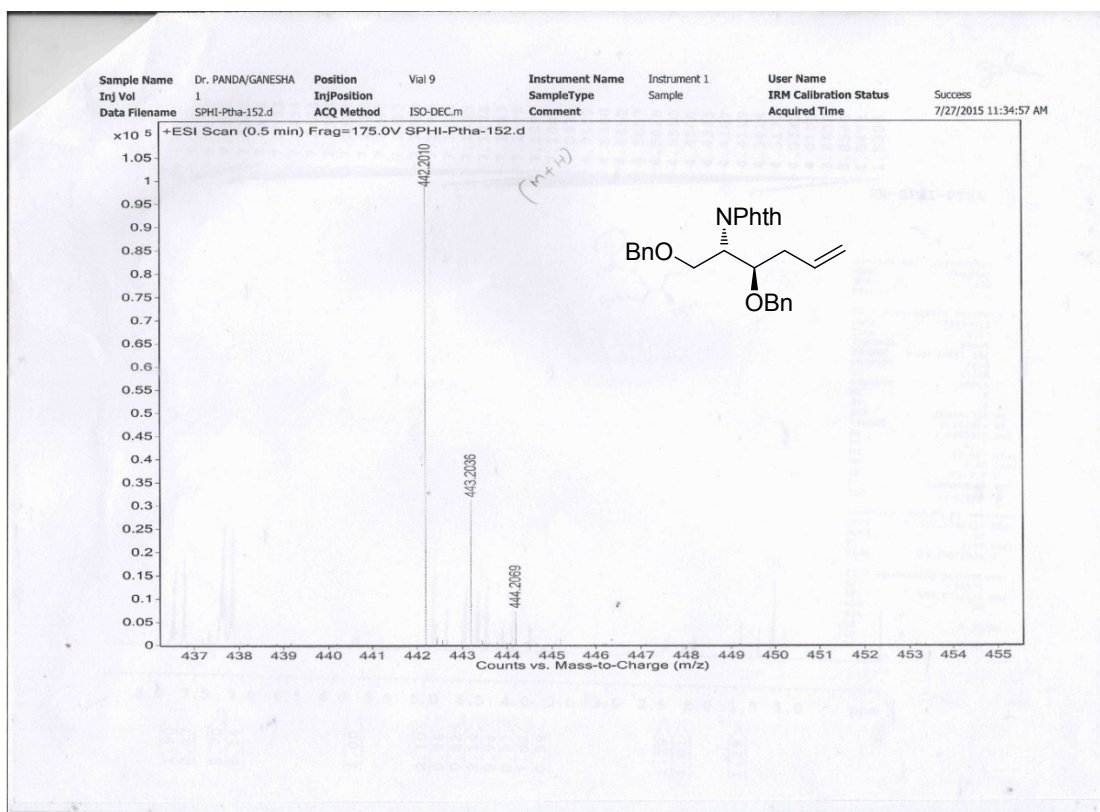

**HRMS Spectra of compounds 4 and 5**



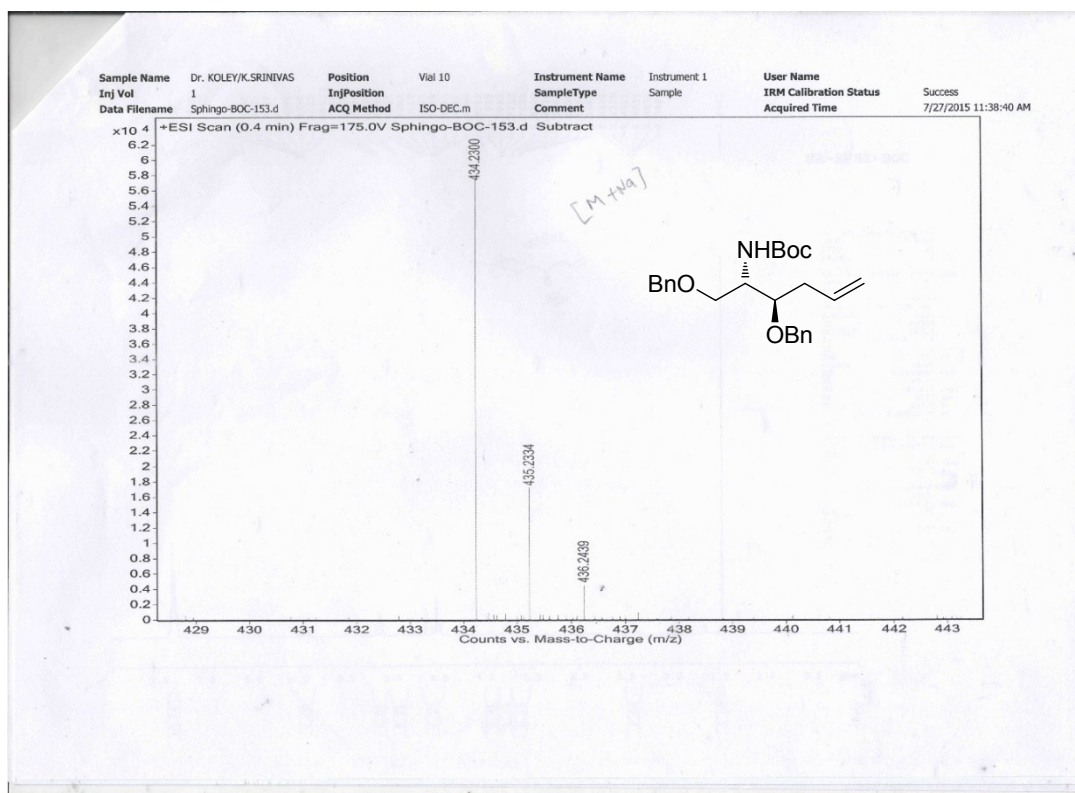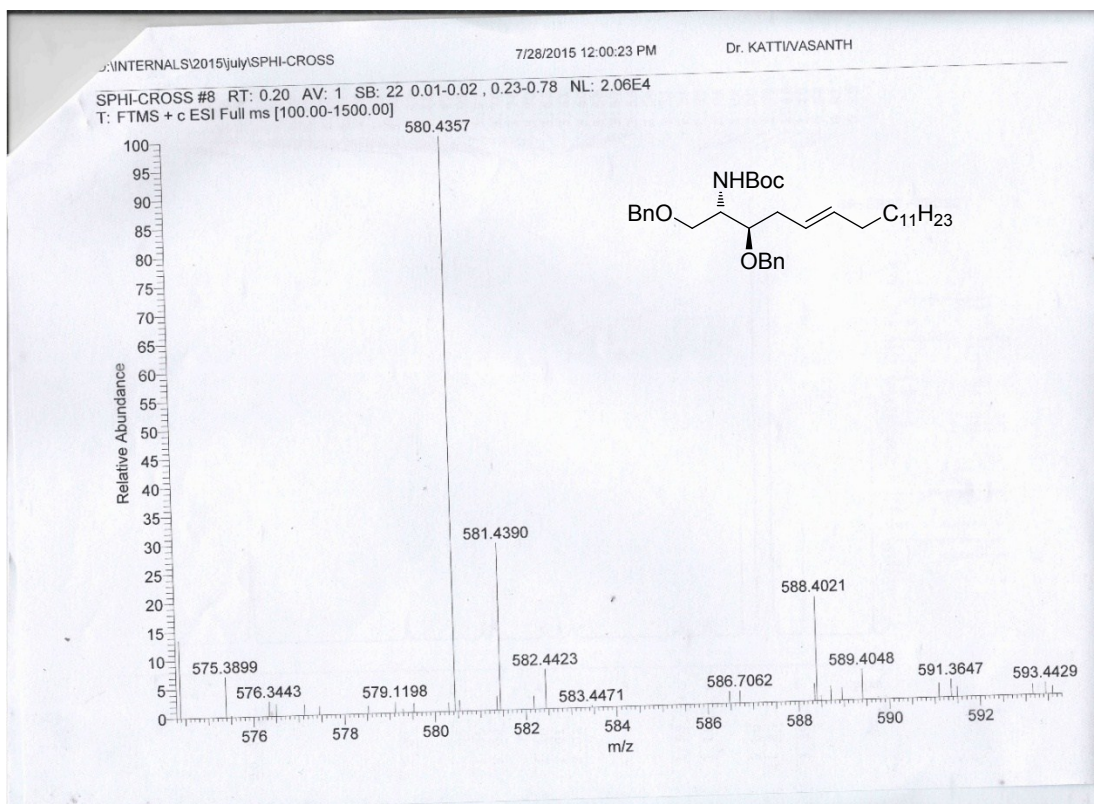

**HRMS Spectra of compounds 7 and 8**

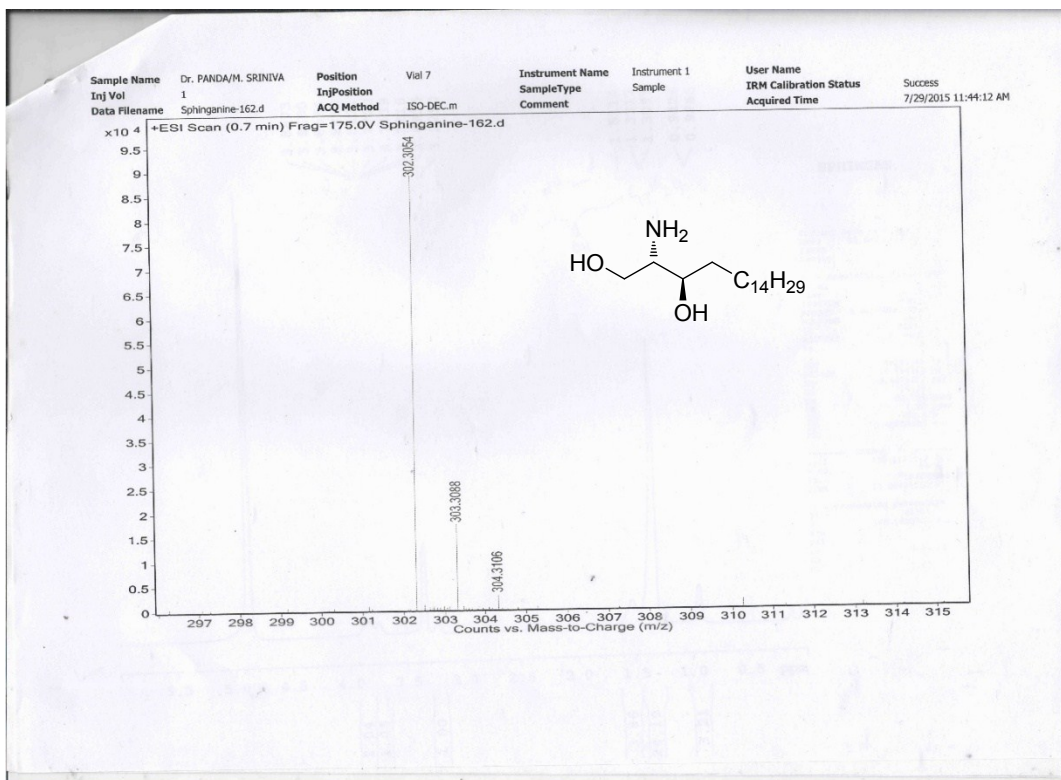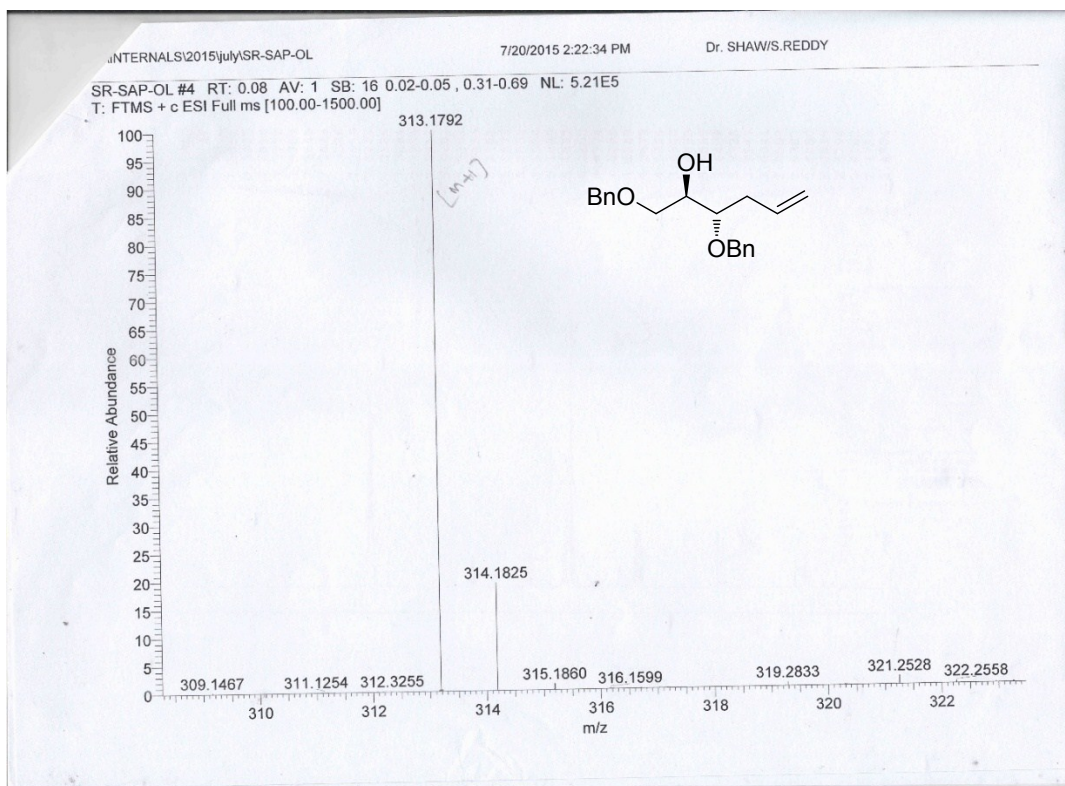

**HRMS Spectra of compounds 1(Sphinganine) and 12**

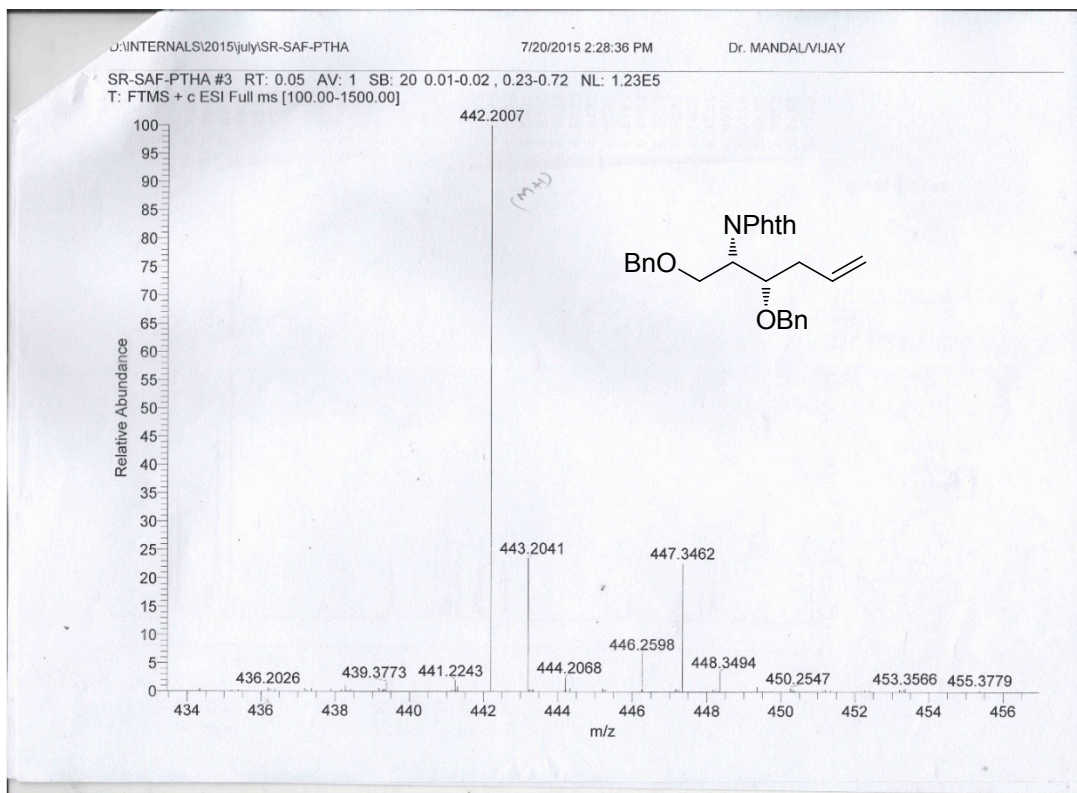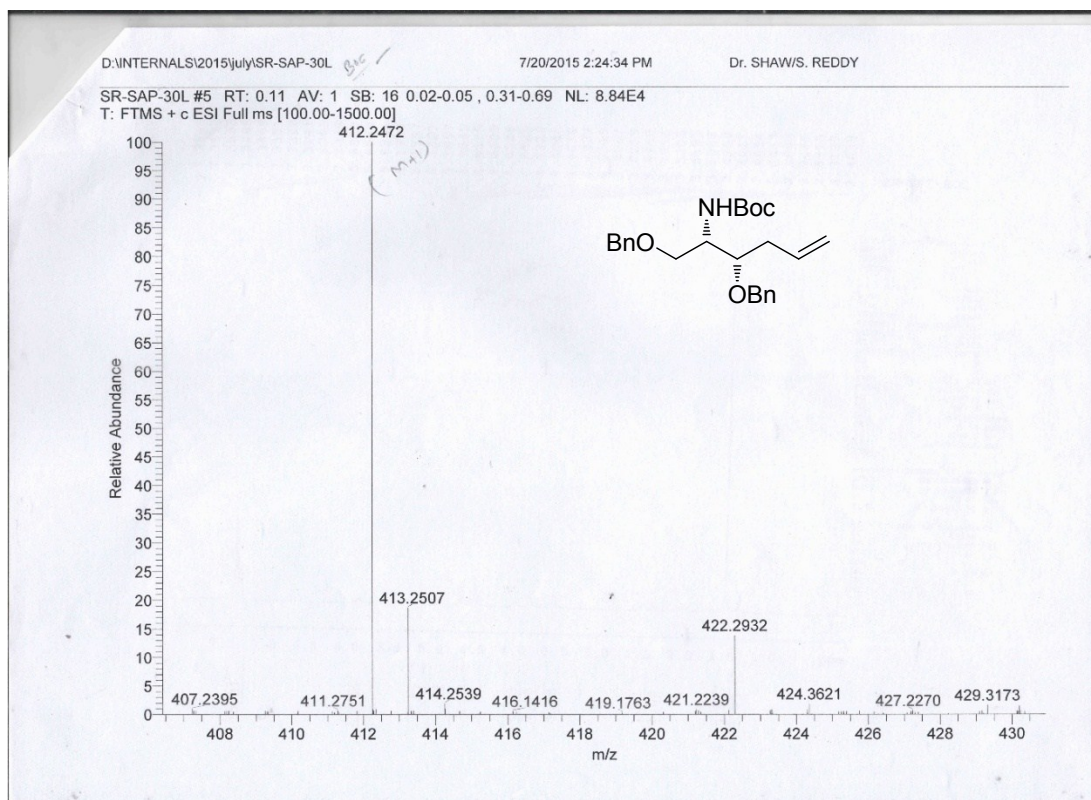

**HRMS Spectra of compounds 13 and 15**

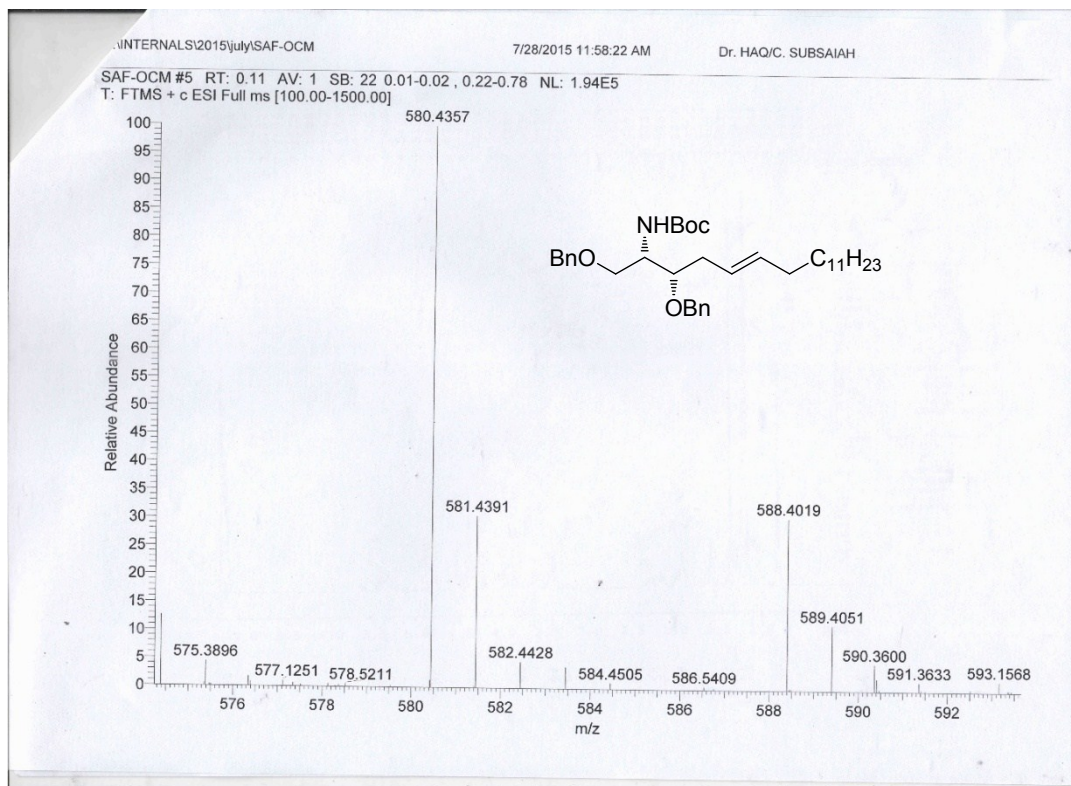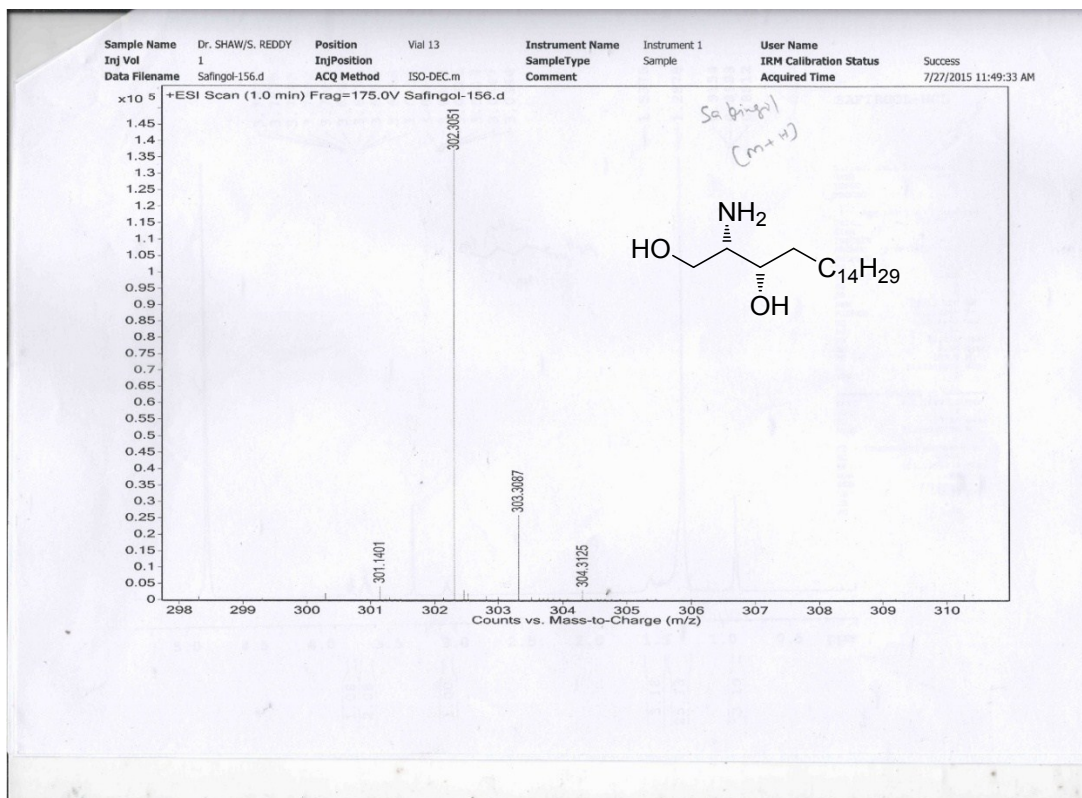

**HRMS Spectra of compounds 16 and 17(Safingol)**
